# Supplementary material
Source: PubMed Central journal article supplement (PMC3346383)
Supplement: supp_78.11.3923_AEM-AEM07932-11-s01.pdf [file supp_78.11.3923_AEM-AEM07932-11-s01.pdf]

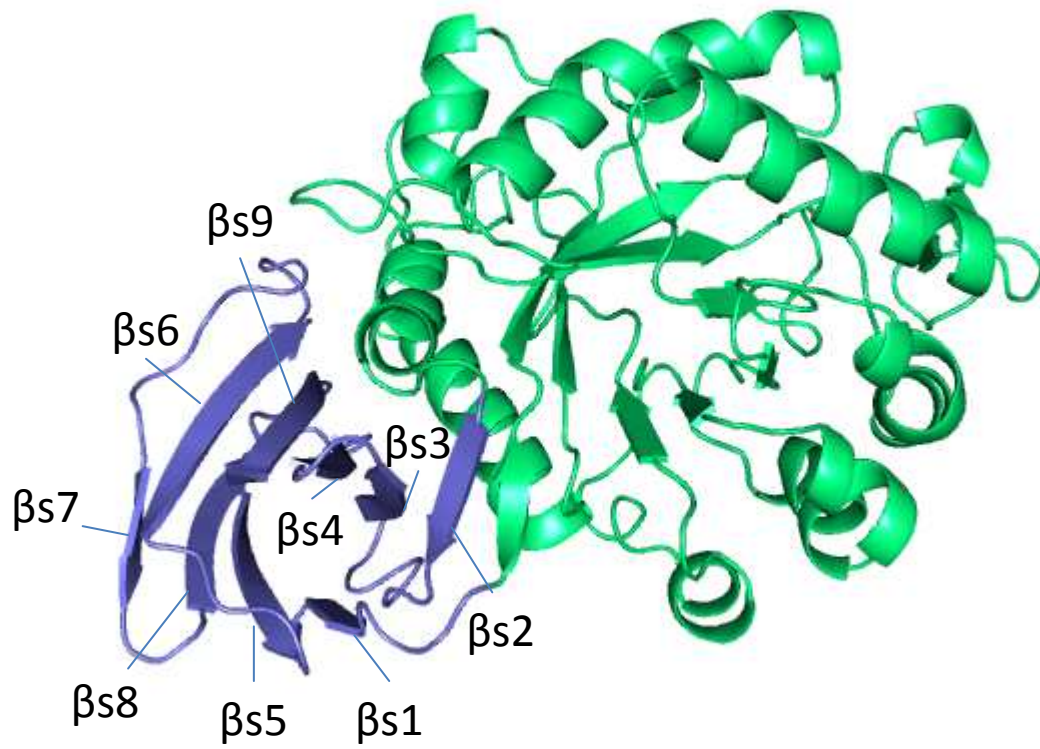

Figure S1

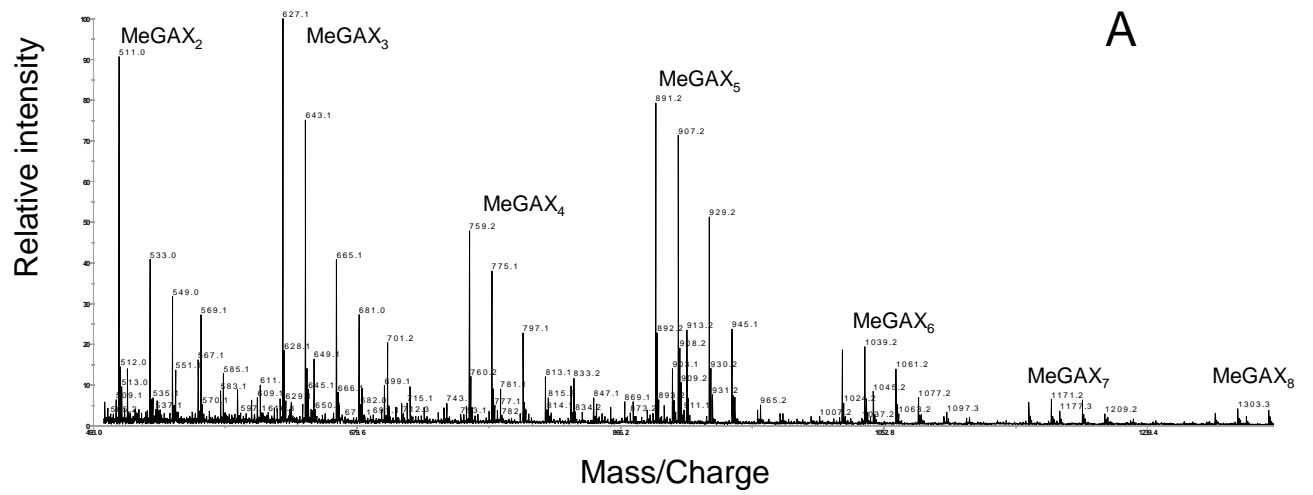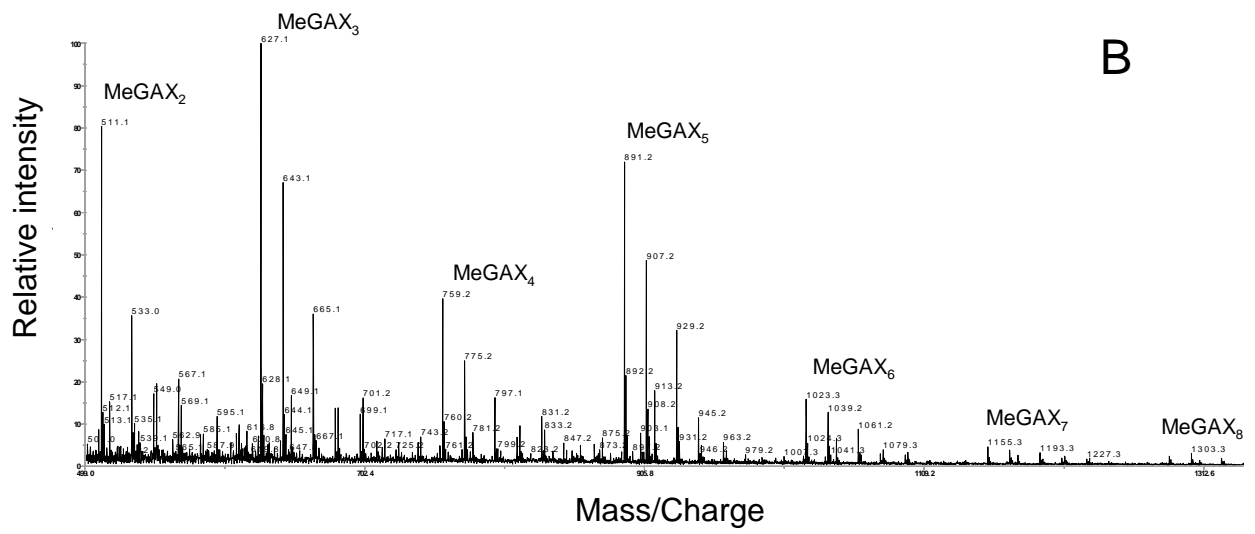

Figure S2

## LIST of SUPPLEMENTARY FIGURES

**Supplementary Figure 1.** Computer modeling of 3D structure of catalytic module of xylanase 30D. The ( $\beta/\alpha$ )<sub>8</sub> barrel is represented in green. The associated  $\beta$ -domain is represented in blue. The numbering of the  $\beta$ s strands is indicated

**Supplementary Figure 2.** MALDI-TOF MS spectra of products of beechwood xylan hydrolysis by Xyn30D (A) or Xyn-CM (B). Formulas of the substituted xylooligosaccharides were deduced from the observed mass-to-charge signals of the corresponding ion adducts
